# Supplementary material
Source: MDPI journal article supplement (https://www.mdpi.com/2073-4344/12/10/1262)
Supplement: s1 [file s1]

## Supplementary Materials

### Propane dehydrogenation on Co-N-C/SiO<sub>2</sub> catalyst: the role of single-atom active sites

Aleksey N. Chernov, Vladimir I. Sobolev, Evgeny Yu. Gerasimov, Konstantin Yu. Koltunov\*

\**koltunov@catalysis.ru*

#### Table of contents

|                                                                                                                                                                                                                    |    |
|--------------------------------------------------------------------------------------------------------------------------------------------------------------------------------------------------------------------|----|
| <b>Figure S1.</b> Survey XPS spectra of the samples.....                                                                                                                                                           | S2 |
| <b>Table S1.</b> The XPS-derived chemical composition of the samples.....                                                                                                                                          | S2 |
| <b>Table S2.</b> The XPS-derived atomic fractions of elements in the samples.....                                                                                                                                  | S2 |
| <b>Figure S2.</b> Propane conversions and selectivities to propylene over Co/SiO <sub>2</sub> as functions of time on stream .....                                                                                 | S3 |
| <b>Figure S3.</b> Propane conversion and selectivity to propylene over Co-N-C/SiO <sub>2</sub> as functions of time on stream (for the increased catalyst loading) .....                                           | S3 |
| <b>Figure S4.</b> HAADF, EDX-STEM mixed C/Si/Co and separate Co, N, C, Si and O mapping images for a typical area of spent Co-N-C/SiO <sub>2</sub> catalyst.....                                                   | S4 |
| <b>Figure S5.</b> HAADF, EDX-STEM mixed C/Si/Co and separate Co, C, Si and O mapping images for the spent Co-N-C/SiO <sub>2</sub> catalyst for the area of increased content of “oversized” Co nanoparticles ..... | S5 |
| <b>Figure S6.</b> HAADF and EDX-STEM C, Co, Si and O mapping images of a carbon nanotube grown out in the spent Co-N-C/SiO <sub>2</sub> catalyst.....                                                              | S6 |
| <b>Figure S7.</b> HAADF and related EDX-STEM mixed elemental mapping images of Co-N-C/SiO <sub>2</sub> -R1, with atomic and mass fraction analysis.....                                                            | S7 |
| <b>Figure S8.</b> Propane conversion and selectivity to propylene over SiO <sub>2</sub> as functions of time on stream (the blank experiment)....                                                                  | S8 |

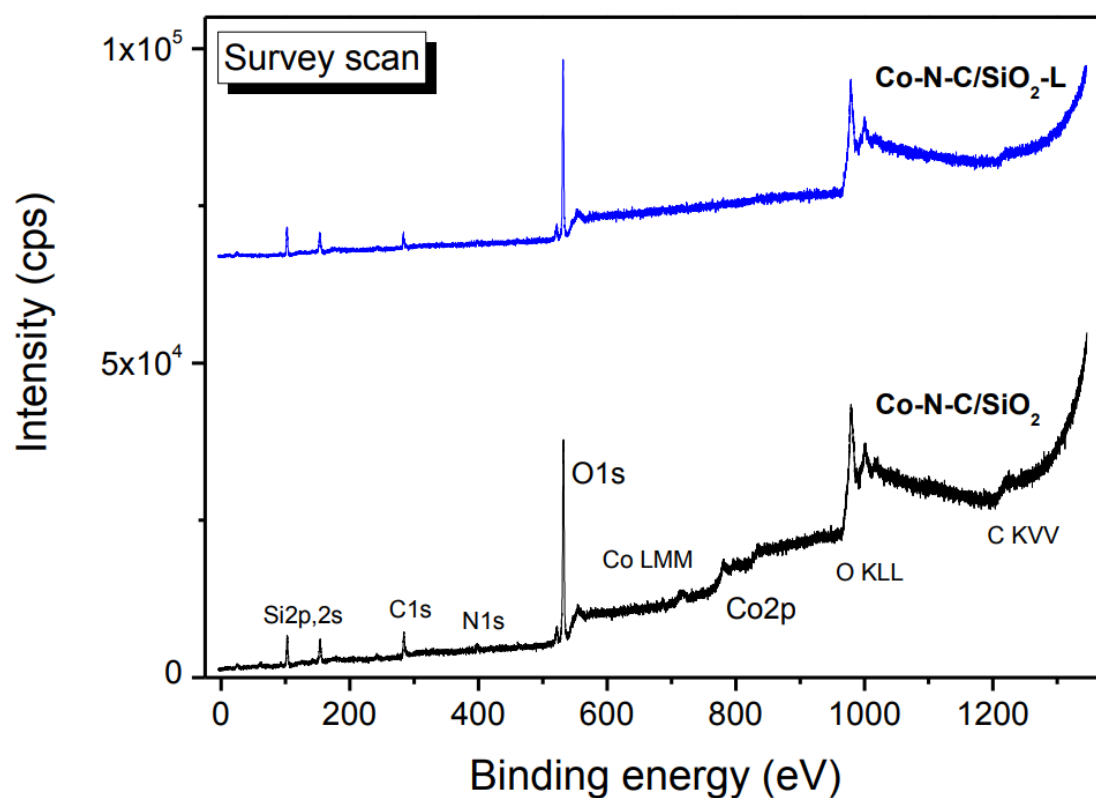

**Figure S1.** Survey XPS of the samples.

**Table S1.** The XPS-derived chemical composition of the samples (%).

| Sample                     | C    | N   | O    | Co  | Si   |
|----------------------------|------|-----|------|-----|------|
| Co-N-C/SiO <sub>2</sub>    | 20.8 | 2.6 | 49.2 | 2.0 | 25.5 |
| Co-N-C/SiO <sub>2</sub> -L | 20.9 | 2.3 | 50.2 | 0.3 | 26.3 |

**Table S2.** The XPS-derived atomic fractions of elements in the samples.

| Sample                     | Co/N | Co/Si | N/Si | O/Si |
|----------------------------|------|-------|------|------|
| Co-N-C/SiO <sub>2</sub>    | 0.75 | 0.08  | 0.10 | 1.93 |
| Co-N-C/SiO <sub>2</sub> -L | 0.13 | 0.01  | 0.09 | 1.91 |

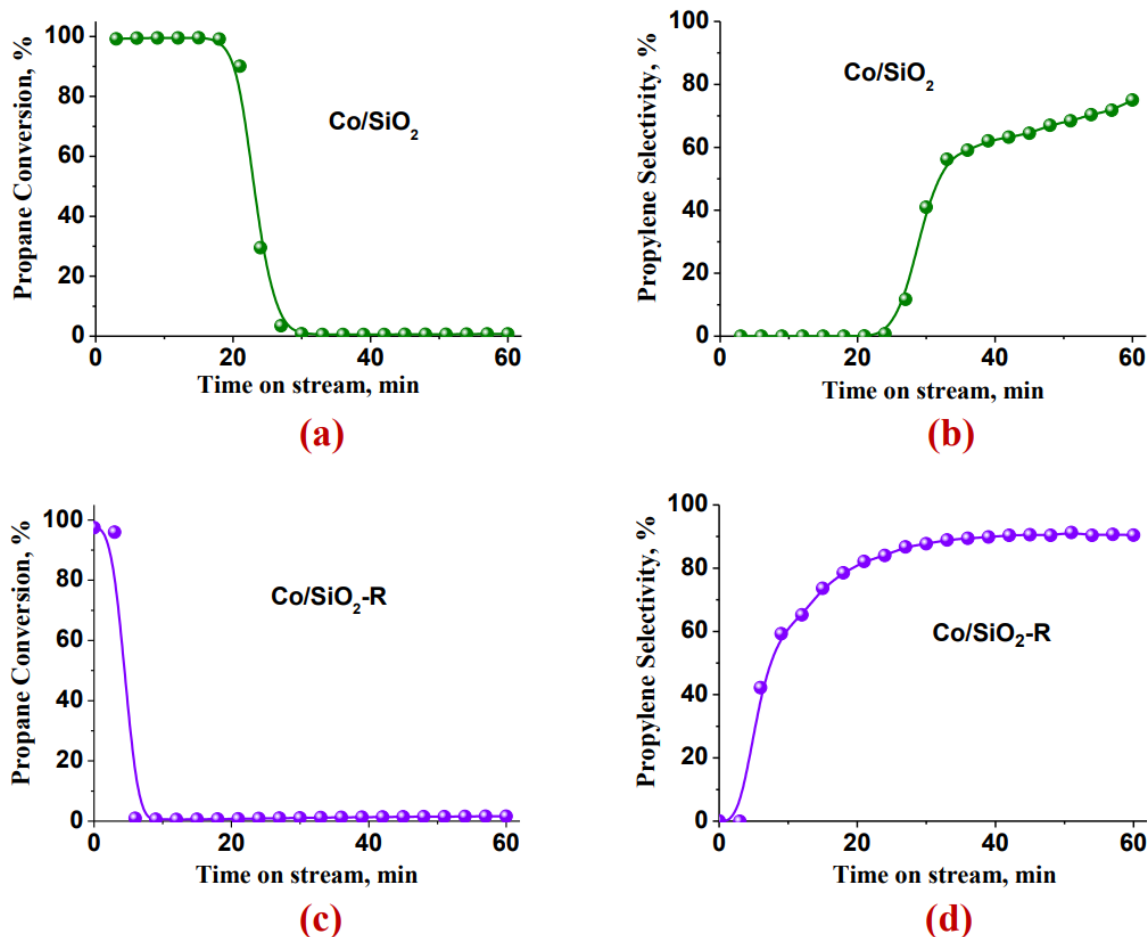

**Figure S2.** Propane conversions (a, c) and selectivities to propylene (b, d) as functions of time on stream over Co/SiO<sub>2</sub> and Co/SiO<sub>2</sub>-R (a fresh sample of Co/SiO<sub>2</sub>, reduced preliminarily in a 25 mL min<sup>-1</sup> flow of H<sub>2</sub> at T = 600 °C for 4 h) at T = 600 °C and P = 1 atm. Gas mixture: 10 vol% propane, N<sub>2</sub> balance; GHSV = 7500 mL h<sup>-1</sup> g<sub>cat</sub><sup>-1</sup>.

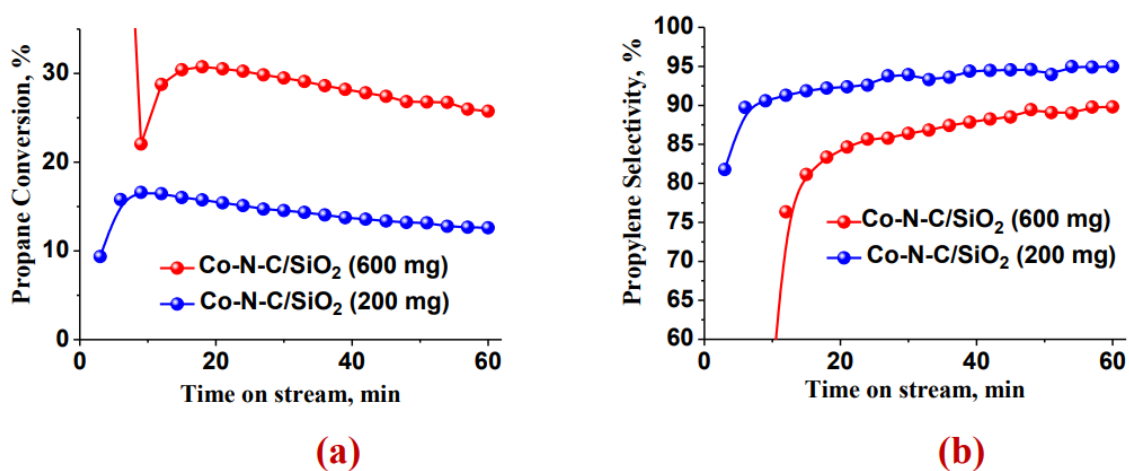

**Figure S3.** Propane conversion (a) and selectivity to propylene (b) as functions of time on stream over Co-N-C/SiO<sub>2</sub> (for the increased catalyst loading) at T = 600 °C and P = 1 atm. Gas mixture: 10 vol% propane, N<sub>2</sub> balance; GHSV = 2500 and 7500 mL h<sup>-1</sup> g<sub>cat</sub><sup>-1</sup>, for a 200 and 600 mg catalyst loadings, respectively.

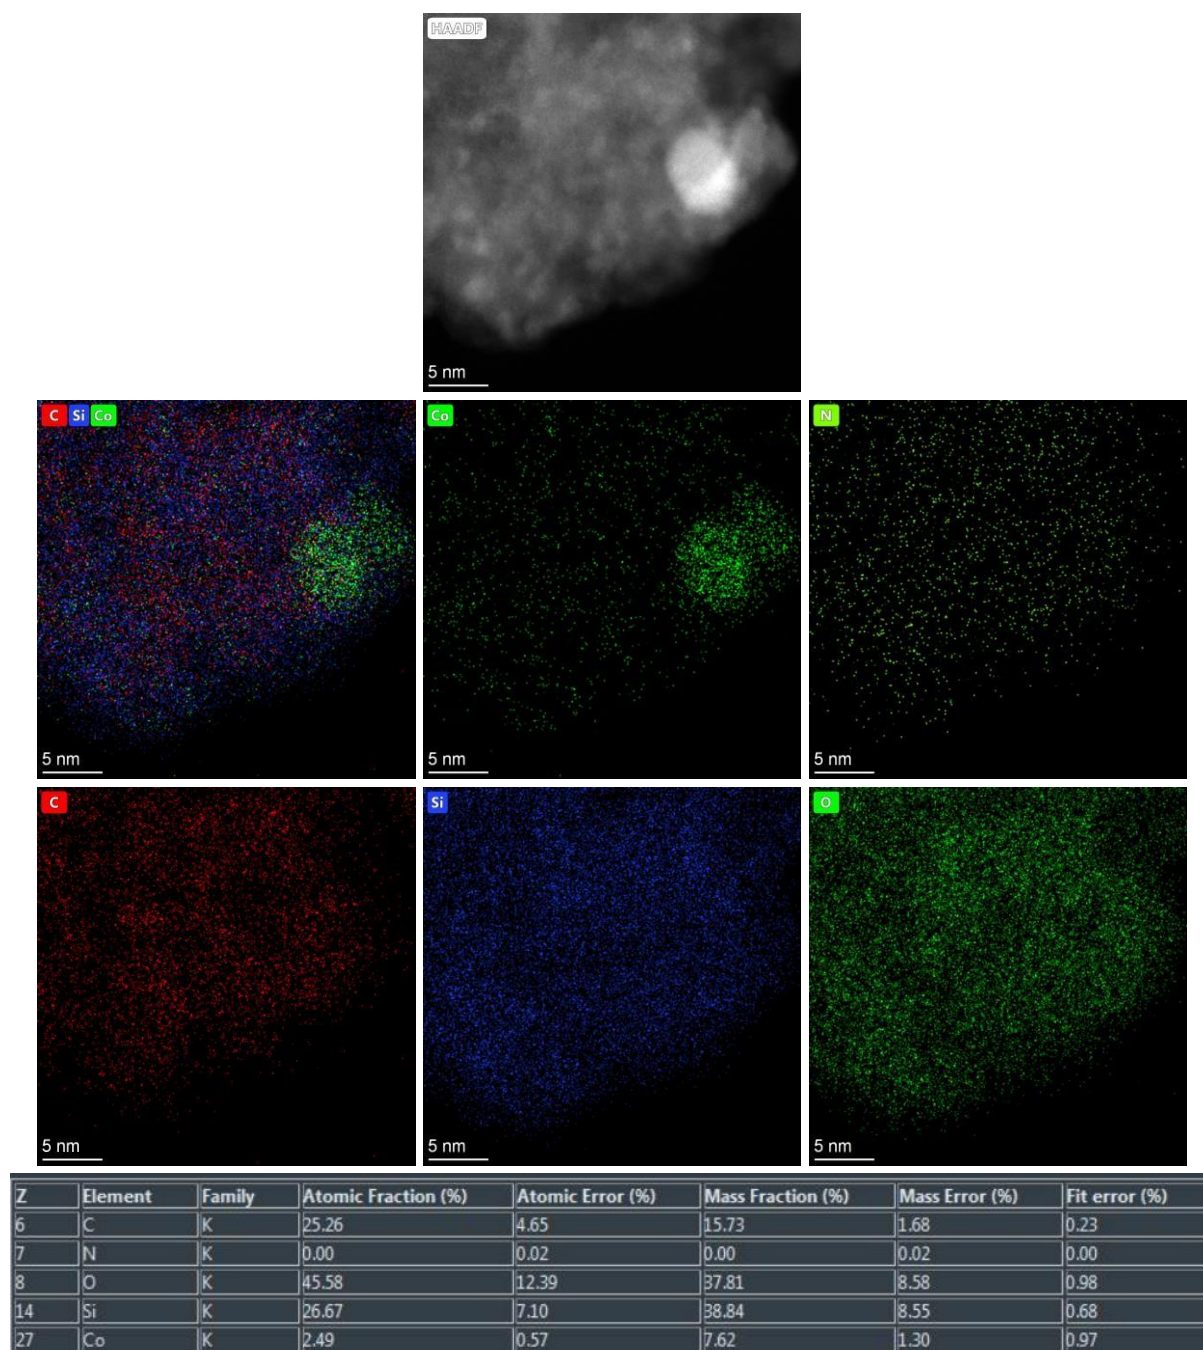

**Figure S4.** HAADF, EDX-STEM mixed C/Si/Co and separate Co, N, C, Si and O mapping images for a typical area of spent Co-N-C/SiO<sub>2</sub> catalyst (after 1 h of operation), with atomic and mass fraction analysis.

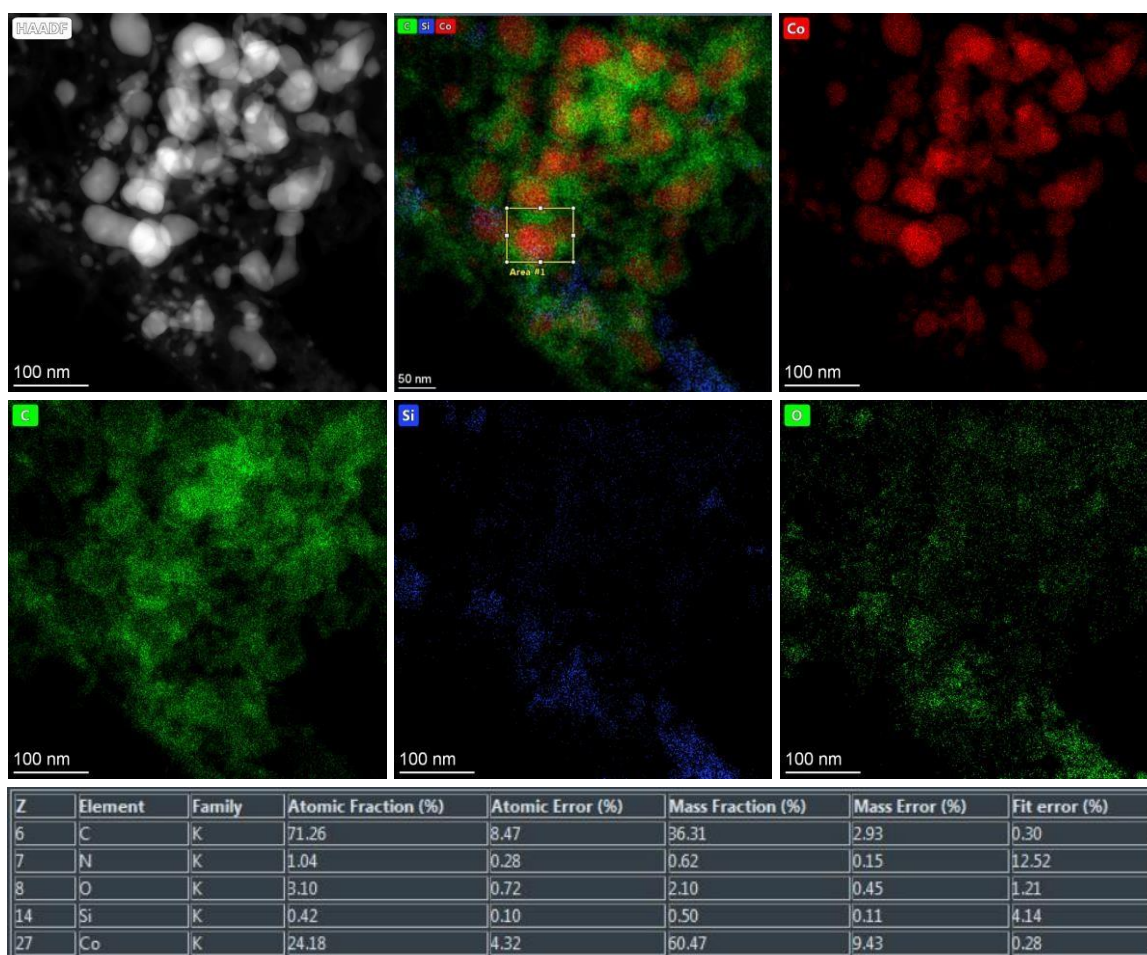

**Figure S5.** HAADF, EDX-STEM mixed C/Si/Co and separate Co, C, Si and O mapping images for the spent Co-N-C/SiO<sub>2</sub> catalyst (after 1 h of operation) for the area of increased content of “oversized” Co nanoparticles, with atomic and mass fraction analysis.



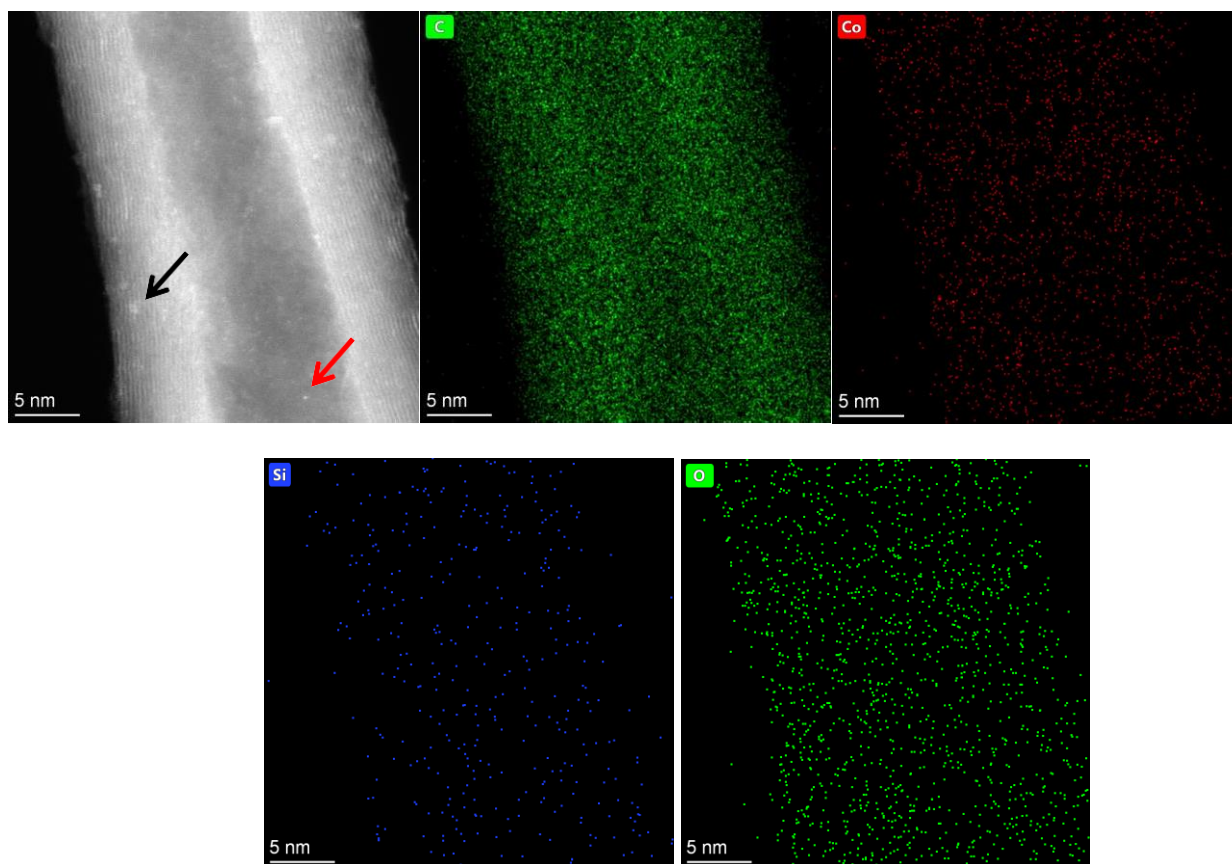

**Figure S6.** HAADF and EDX-STEM C, Co, Si and O mapping images of a carbon nanotube grown out in the spent Co-N-C/SiO<sub>2</sub> catalyst (after 1 h of operation). Black arrow shows Co nanocluster. Red arrow shows a single atom of cobalt.

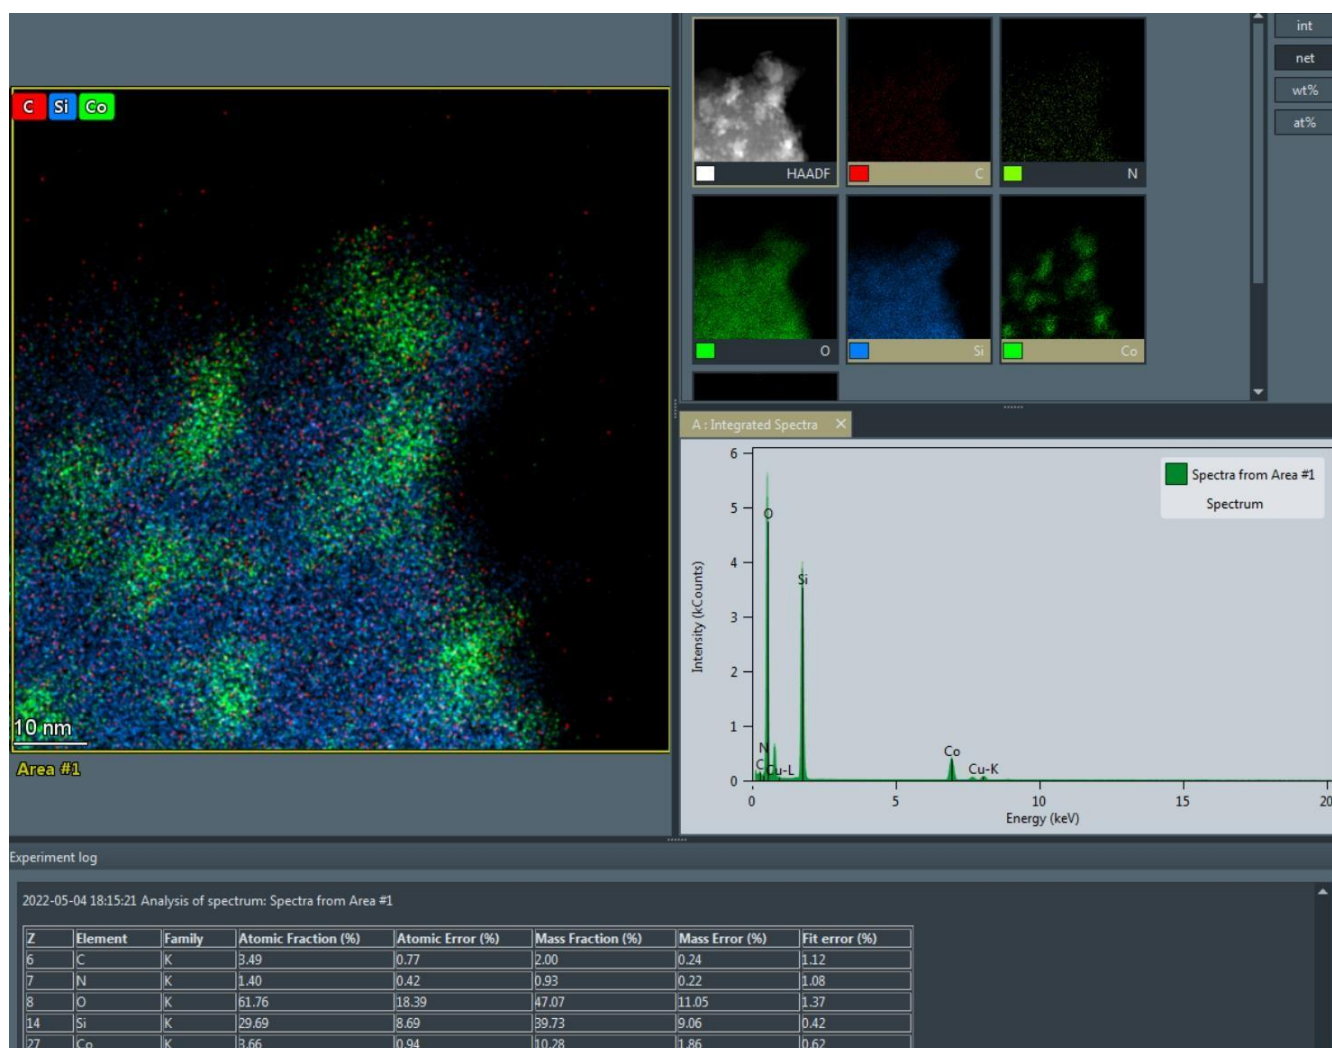

**Figure S7.** HAADF and related EDX-STEM mixed elemental mapping images of Co-N-C/SiO<sub>2</sub>-R1 catalyst, with atomic and mass fraction analysis.

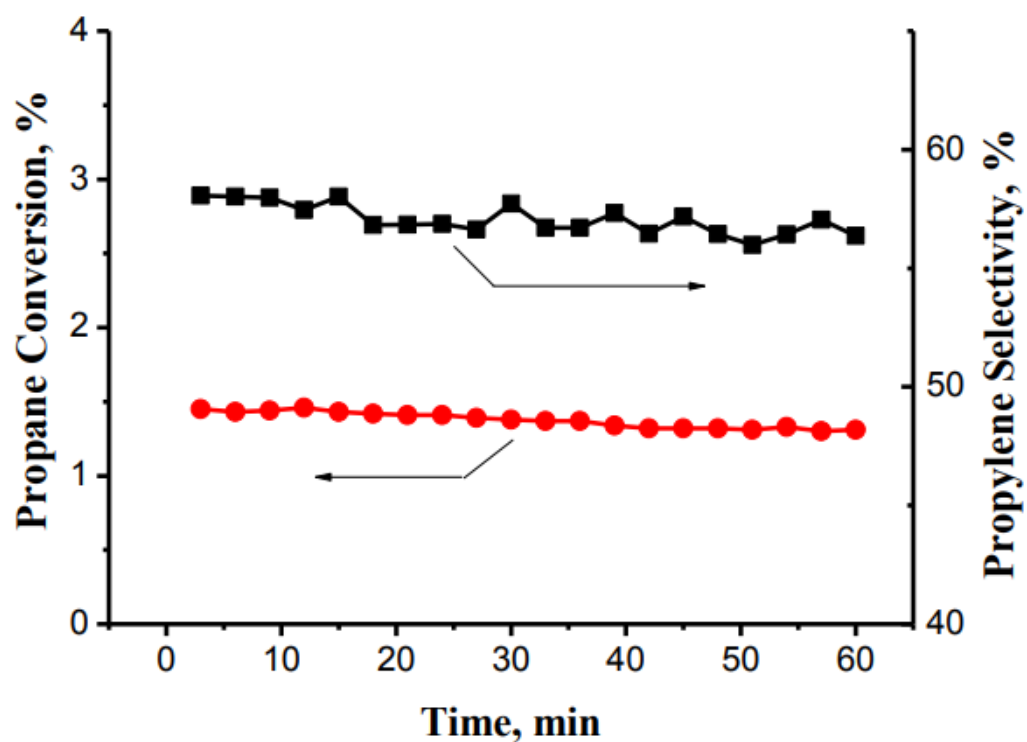

**Figure S8.** Propane conversion and selectivity to propylene as functions of time on stream over SiO<sub>2</sub> (1 mL, quartz particles of  $d = 0.45$  to 1 mm) at  $T = 600$  °C and  $P = 1$  atm. Gas mixture: 10 vol% propane, N<sub>2</sub> balance; GHSV =  $7500 \text{ mL h}^{-1} \text{ g}_{\text{cat}}^{-1}$ .
